# Supplementary material for: Design of a Company-Engagement Model for Procurement and Supply Management Classes
Source: MDPI journal article supplement (doi:10.3390/logistics7010007), 2023-01-28
Supplement: s1 [file s1]

Archive with 1 entries (1 files):
- logistics-2029234-supplementary.pdf
